# Supplementary material for: Momentum forcing of the quasi-biennial oscillation by equatorial waves in recent reanalyses
Source: Copernicus journal article supplement (doi:10.5194/acp-15-6577-2015), 2015-06-16
Supplement: Supplementary file 1 [file acp-15-6577-2015-supplement.pdf]

Supplement of Atmos. Chem. Phys., 15, 6577–6587, 2015  
<http://www.atmos-chem-phys.net/15/6577/2015/>  
doi:10.5194/acp-15-6577-2015-supplement  
© Author(s) 2015. CC Attribution 3.0 License.

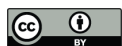

*Supplement of*

## **Momentum forcing of the quasi-biennial oscillation by equatorial waves in recent reanalyses**

**Y.-H. Kim and H.-Y. Chun**

*Correspondence to:* H.-Y. Chun (chunhy@yonsei.ac.kr)

The copyright of individual parts of the supplement might differ from the CC-BY 3.0 licence.

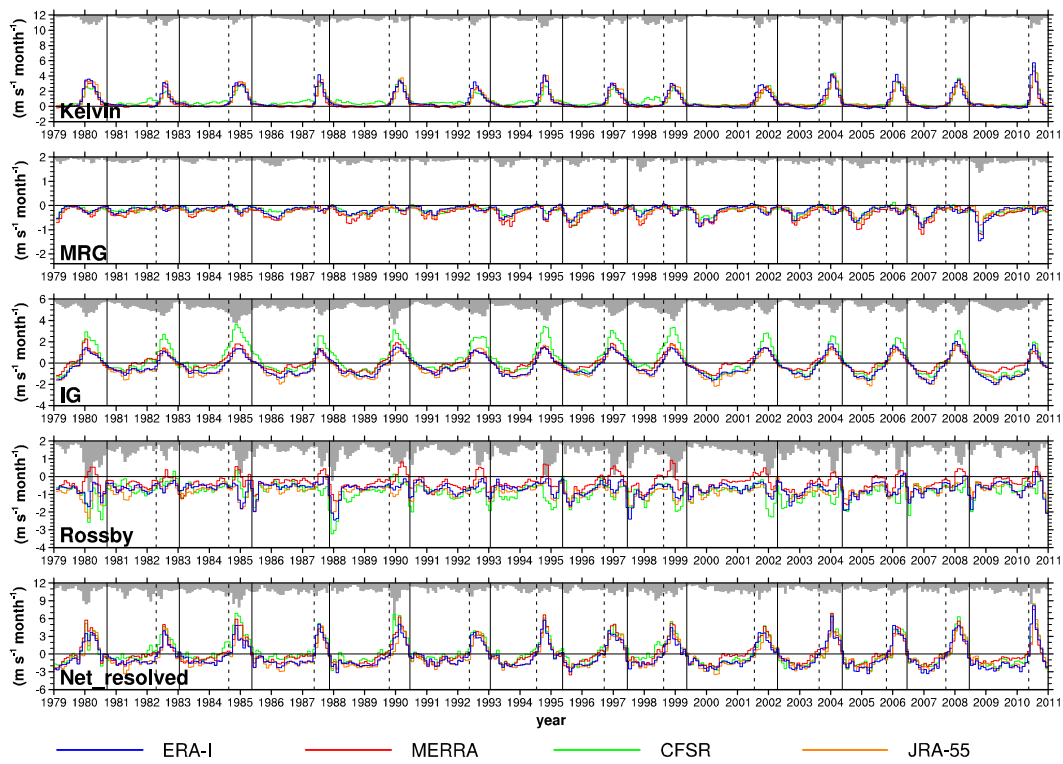

**Figure S1.** The same as in Fig. 2 except for the forcing averaged over  $10^\circ \text{ N} - 10^\circ \text{ S}$ .

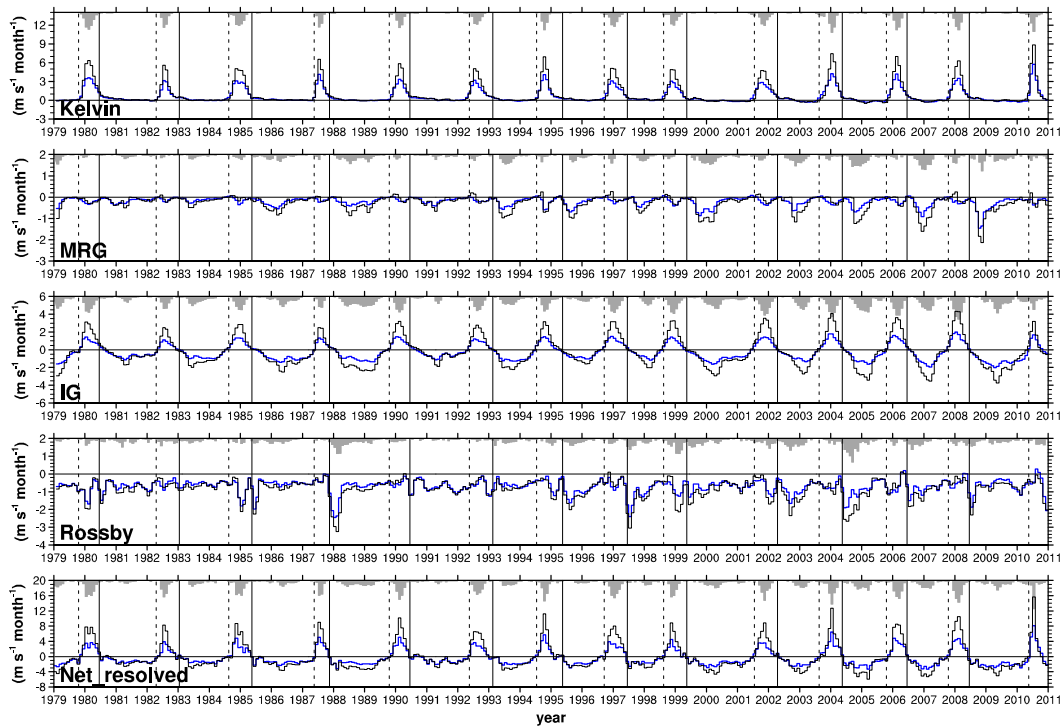

Figure S2. The same as in Fig. 3 except for the forcing averaged over  $10^\circ \text{ N} - 10^\circ \text{ S}$ .

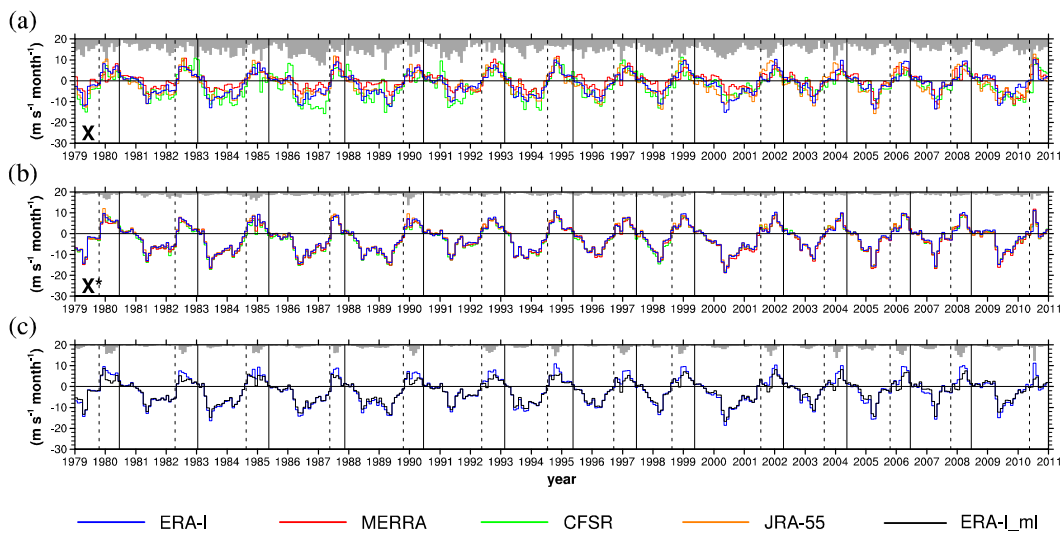

Figure S3. The same as in Fig. 6 except for the forcing averaged over  $10^\circ \text{ N} - 10^\circ \text{ S}$ .
